# Supplementary material for: Liver-directed moderately hypo-fractionated radiotherapy combined with pembrolizumab and bevacizumab for advanced hepatocellular carcinoma: a retrospective observational study of 23 cases
Source: PubMed Central journal article supplement — Transl Cancer Res. 2024 Mar 11;13(3):1508–18. doi: 10.21037/tcr-23-1333 (PMC11009807; doi:10.21037/tcr-23-1333), 2024-03-11
Supplement: tcr-13-03-1508-dss.pdf [file tcr-13-03-1508-dss.pdf]

## Data Sharing Statement

|                     |                                                                                                                                                    |                                                                                         |
|---------------------|----------------------------------------------------------------------------------------------------------------------------------------------------|-----------------------------------------------------------------------------------------|
| <b>Article Info</b> | <a href="https://dx.doi.org/10.21037/tcr-23-1333">https://dx.doi.org/10.21037/tcr-23-1333</a>                                                      |                                                                                         |
| <b>Item</b>         | <b>Question</b>                                                                                                                                    | <b>Authors' Response<br/>(place "-" if not applicable)</b>                              |
| 1                   | Would you like to share data collected for your study to others?                                                                                   | Yes.                                                                                    |
| 2                   | If not, would you like to share the reason for your decision?                                                                                      | -                                                                                       |
| 3                   | What data in particular will be shared?                                                                                                            | Details of medical records.                                                             |
| 4                   | Any other documents will be share? Such as study protocol, statistical analysis plan, informed consent form, clinical study report, analytic code. | Statistical analysis plan and clinical study report will also be shared if requested.   |
| 5                   | When will data availability begin?                                                                                                                 | From the publication date.                                                              |
| 6                   | When will data availability end?                                                                                                                   | Two years within the publication date.                                                  |
| 7                   | To whom will you share the data?                                                                                                                   | Oncologists who are interested in comprehensive treatment for hepatocellular carcinoma. |
| 8                   | For what type of analysis or purpose?                                                                                                              | For purpose to improve treatment scheme for advanced hepatocellular carcinoma.          |
| 9                   | How or where can the data/documents be obtained?                                                                                                   | Emails could be sent to liangxuex9@mail.sysu.edu.cn                                     |
| 10                  | Any other restrictions?                                                                                                                            | None                                                                                    |
